# Supplementary material for: Inflamma-miR-21 Negatively Regulates Myogenesis during Ageing
Source: MDPI journal article supplement (doi:10.3390/antiox9040345), 2020-04-23
Supplement: s1 [file s1]

Supplementary Material:

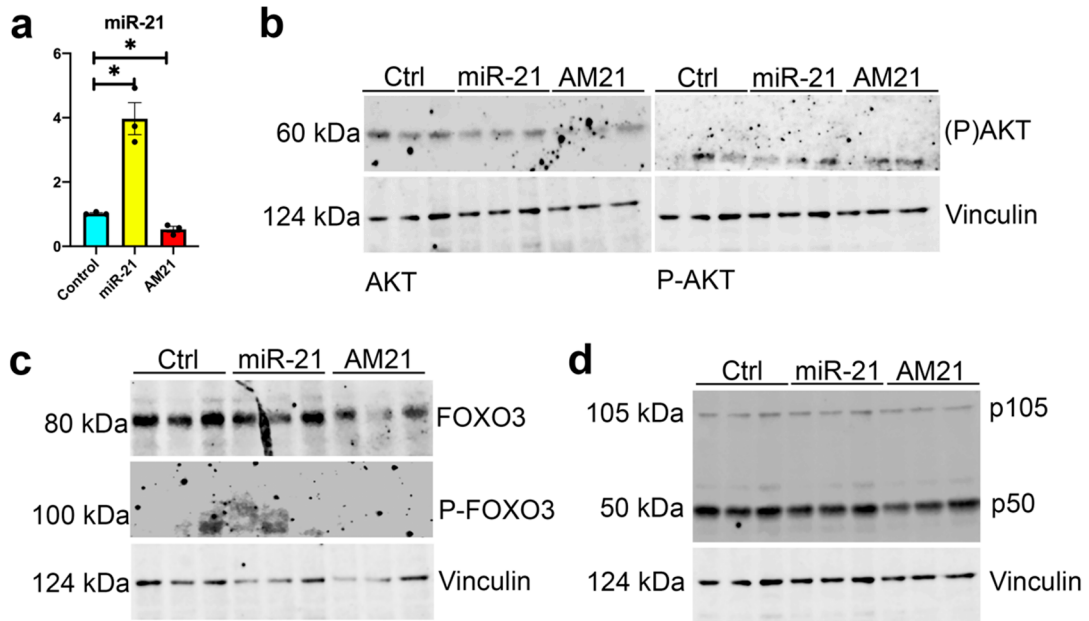

**Figure S1.** miR-21 does not affect AKT or NFkB signalling in mouse primary myoblasts. (a) miR-21 expression in primary myoblasts following treatment with miR-21 mimic or antagomiR (AM21). qPCR shows expression relative to Rnu-6;  $n = 3$ . Error bars show SEM. \*  $p < 0.05$ . (b,c) miR-21 and has no effect no effect on AKT and phosphorylated AKT (P-AKT) levels or Nfkb1 expression as demonstrated by Western blot. (d) miR-21 upregulation may lead to increase in P-FoxO3 but not FoxO3 protein levels. • indicates individual replicates, Error bars show SEM; \*  $p < 0.05$ .
